# Supplementary material for: Systematic investigation of the adsorption potential of lignin- and cellulose-based nanomaterials towards pharmaceuticals
Source: Royal Society of Chemistry journal article supplement (doi:10.1039/d2en00186a), 2022-01-01
Supplement: d2en00186a1.pdf [file d2en00186a1.pdf]

## Systematic investigation of the adsorption potential of lignin- and cellulose-based nanomaterials towards pharmaceuticals

Melissa B. Agustin<sup>a\*</sup>, Kirsi S. Mikkonen<sup>a,b</sup>, Marianna Kemell<sup>c</sup>, Panu Lahtinen<sup>d</sup>, Mari Lehtonen<sup>a</sup>

<sup>a</sup> Department of Food and Nutrition, Faculty of Agriculture and Forestry, P.O. Box 66, FI-00014, University of Helsinki, Finland

<sup>b</sup> Helsinki Institute of Sustainability Science, P.O. Box 65, FI-00014, University of Helsinki, Finland

<sup>c</sup> Department of Chemistry, Faculty of Science, P.O. Box 55, FI-00014, University of Helsinki, Finland

<sup>d</sup> VTT, Technical Research Centre of Finland, P.O. Box 1000, FIN-02044 VTT, Finland

### SUPPORTING INFORMATION

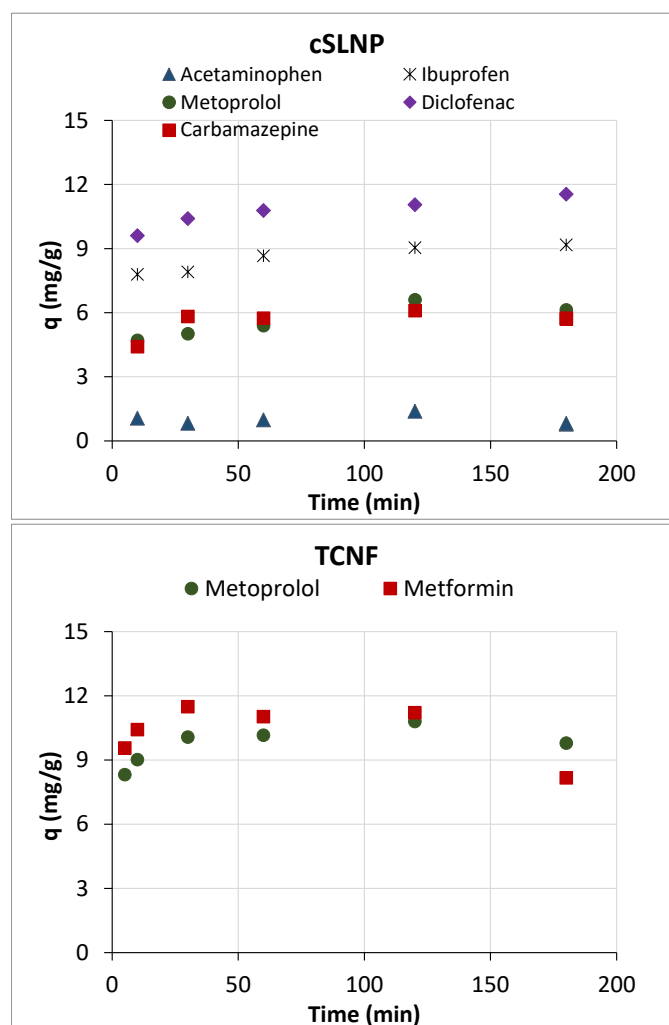

**Figure S1.** Changes in adsorption capacity ( $q$ , mg/g) of cationic SLNP and TCNF with time. Adsorption conditions: room temperature,  $20\mu\text{g/ml}$  initial concentration for each pharmaceutical,  $1\text{ mg/mL}$  mass to volume ratio of adsorbent to pharmaceutical solution,  $\text{pH}\approx 5$ . Only the APIs that exhibited significant adsorption for each nanomaterial was shown. The cSLNP did not show significant adsorption for metformin while the TCNF only showed significant adsorption for the cationic metoprolol and metformin.

**A**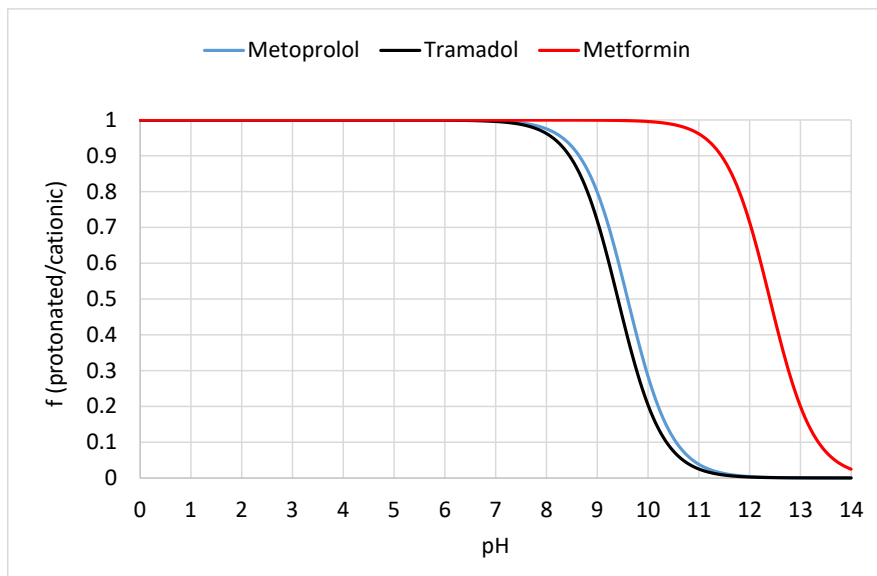**B**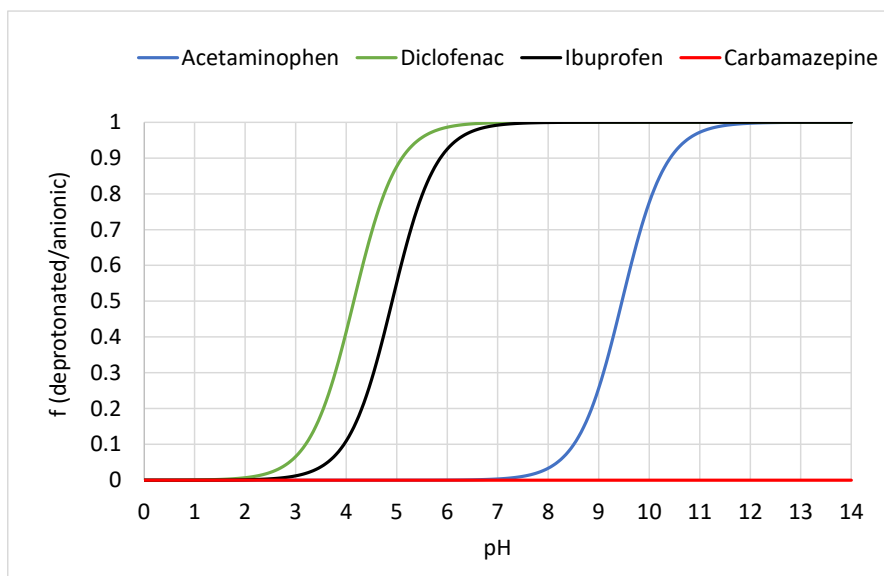

**Figure S2.** The fraction ( $f$ ) distribution of cationic (A) and anionic (B) species of the seven pharmaceuticals as a function of pH calculated from their pKa values using the Henderson-Hasselbach equation.
